# Supplementary material
Source: MDPI journal article supplement (https://www.mdpi.com/1999-4907/10/10/833)
Supplement: s1 [file s1]

## Supplementary Materials

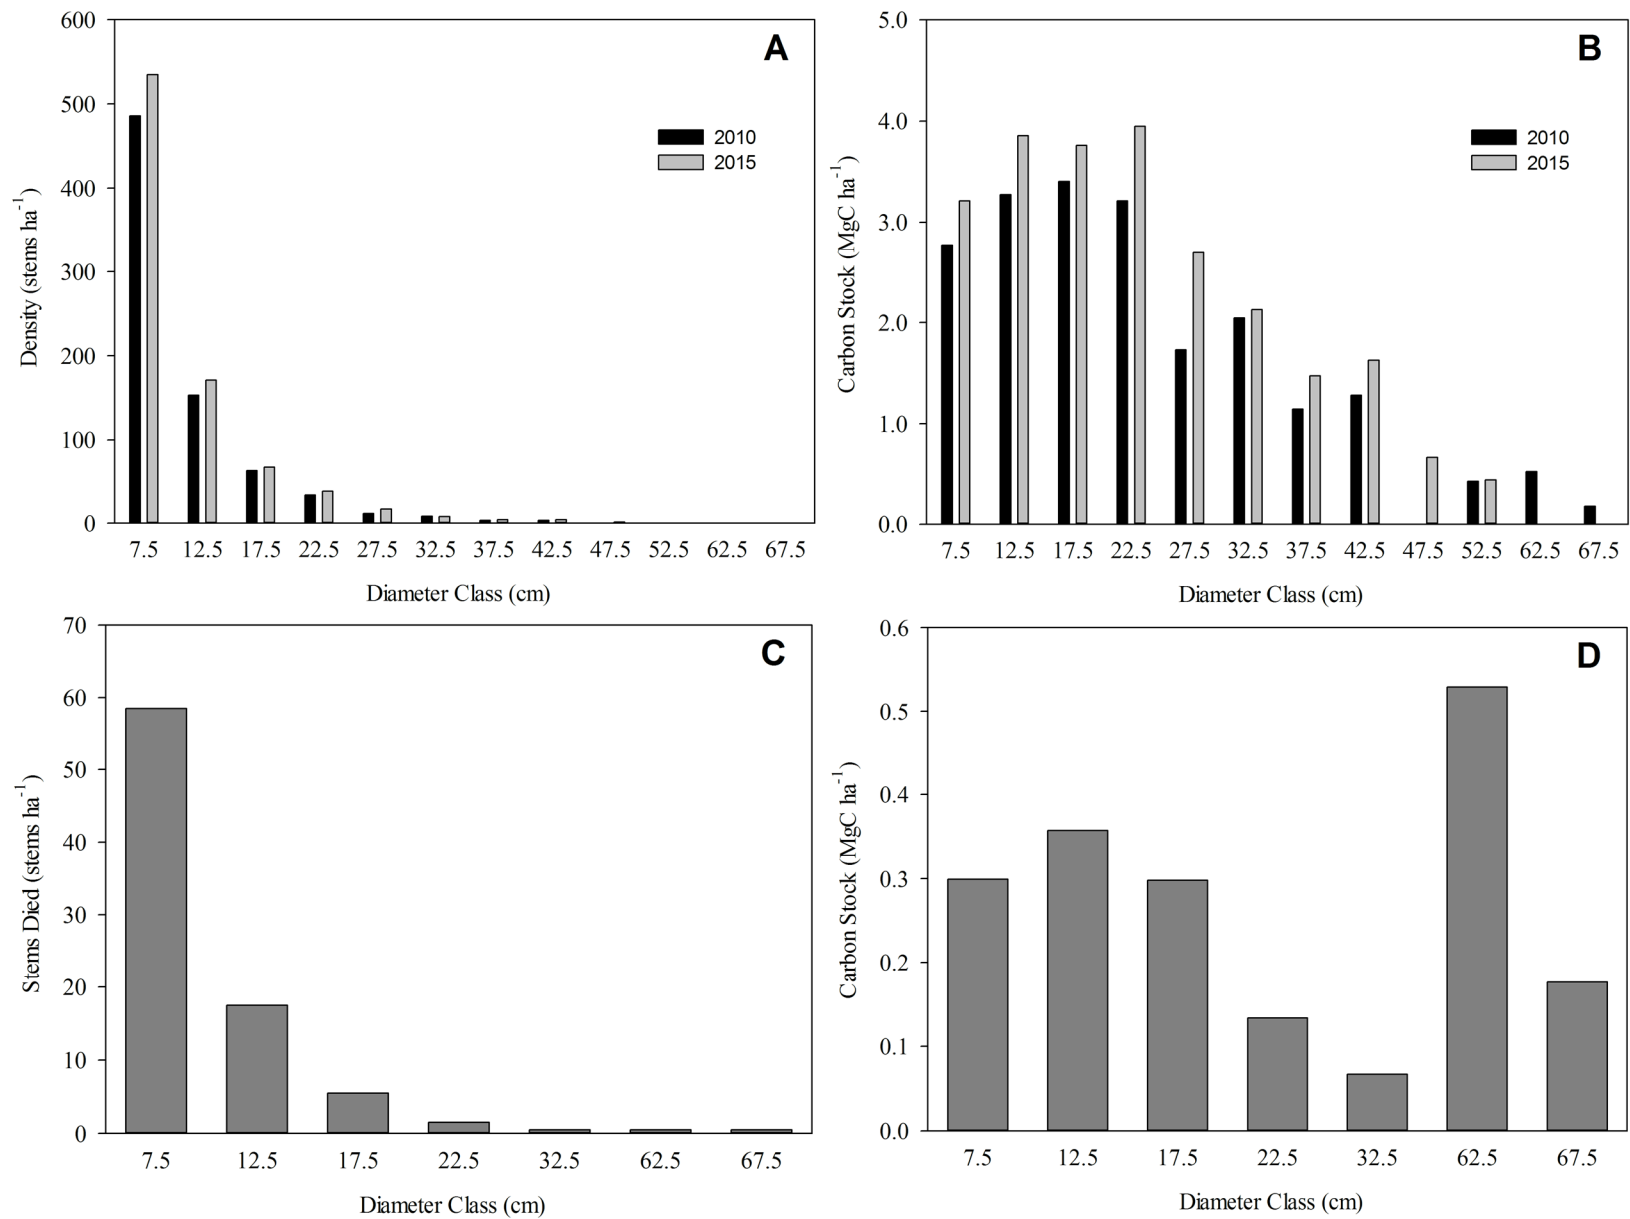

**Figure S1.** A) Density (stems  $\text{ha}^{-1}$ ) of live trees; B) Carbon Stock ( $\text{MgC ha}^{-1}$ ) of live trees; C) Stems died (stems  $\text{ha}^{-1}$ ) in the period 2010-2015; and D) Carbon Stock ( $\text{MgC ha}^{-1}$ ) of dead trees in the period 2010-2015.
